# Supplementary material for: The Value of First Trimester Inflammatory Indices in Predicting the Development of Preeclampsia in the Third Trimester
Source: Research Square preprint supplement (doi:10.21203/rs.3.rs-6596809/v1), 2025-05-19
Supplement: Supplementary file 1 [file 6d45cb68089c63e341b2463b.xlsx]

## Sheet: Sheet1
hasta grubu	yaş	gravida	parite	Vücut kitle indeksi	doğum haftası	doğum kilosu	1. dakika apgar	5.dakika apgar	lökosit	nötrofil	lenfosit	monosit	platelet	NLR	PLR	LMR	SII	SIRI	AISI	hematokrit	hemoglobin	doğum şekli	yenidoğan yoğum bakım yatışı
1	30	2	1	32	39	3655	8	10	7.6	5.5	1.45	0.6	276	3.7931	190.345	2.41667	1046.9	2.27586	628.138	40.1	13.4	2	0
1	30	2	1	30	38	3005	8	10	10.7	7	2.8	0.8	277	2.5	98.9286	3.5	692.5	2	554	41.3	14.2	1	0
1	28	4	0	43	38	2950	8	10	11.4	10.1	0.94	0.3	304	10.7447	323.404	3.13333	3266.38	3.2234	979.915	35.3	10.9	2	0
1	26	1	0	36	39	2228	8	10	13.8	10.4	2.45	0.8	214	4.2449	87.3469	3.0625	908.408	3.39592	726.727	33.8	11.5	2	0
1	33	3	2	26	32	1770	7	9	6.7	4.8	1.56	0.3	262	3.07692	167.949	5.2	806.154	0.923077	241.846	33.8	11.7	2	0
1	23	1	0	33	38	3140	7	8	8.2	5.3	2.04	0.7	229	2.59804	112.255	2.91429	594.951	1.81863	416.466	33	11.2	1	0
1	30	2	1	28	40	3500	8	10	8.8	6.3	1.84	0.4	252	3.42391	136.957	4.6	862.826	1.36957	345.13	36.9	12.6	1	0
1	31	3	1	21	38	2500	8	10	14.3	10.2	3.1	0.9	330	3.29032	106.452	3.44444	1085.81	2.96129	977.226	39.5	13.4	1	0
1	25	2	1	30	41	3450	7	9	13.6	10.8	1.62	1.2	179	6.66667	110.494	1.35	1193.33	8	1432	36.8	12.6	2	0
1	25	2	1	25	39	3600	8	10	9.4	5.4	3.33	0.6	260	1.62162	78.0781	5.55	421.622	0.972973	252.973	34.1	10.3	1	0
1	35	2	1	33	40	2550	8	9	12.3	10.5	1.29	0.5	306	8.13953	237.209	2.58	2490.7	4.06977	1245.35	35	12.5	1	0
1	32	2	1	25	39	3190	8	9	7.7	5.2	1.42	1	301	3.66197	211.972	1.42	1102.25	3.66197	1102.25	27.3	8.5	1	0
1	29	5	2	30	39	3485	8	10	14.1	9	3.84	1	208	2.34375	54.1667	3.84	487.5	2.34375	487.5	41.2	13.7	1	0
1	32	8	5	25	39	3600	8	10	8.3	6.2	1.23	0.5	249	5.04065	202.439	2.46	1255.12	2.52033	627.561	38.1	12.5	1	0
1	32	2	1	32	38	3310	8	10	13.6	10	2.42	1	293	4.13223	121.074	2.42	1210.74	4.13223	1210.74	31	9.9	2	0
1	30	2	1	30	40	3110	8	10	10.8	8.7	1.55	0.5	192	5.6129	123.871	3.1	1077.68	2.80645	538.839	33.4	10.9	1	0
1	20	1	0	30	40	2840	7	9	9.6	5.5	3.02	0.8	312	1.82119	103.311	3.775	568.212	1.45695	454.57	36.9	12.1	2	0
1	26	4	2	35	40	3400	8	10	7.6	4.8	2.1	0.5	289	2.28571	137.619	4.2	660.571	1.14286	330.286	36.7	12.6	1	0
1	37	4	2	29	40	3350	8	10	9.8	6.2	3.02	0.5	248	2.05298	82.1192	6.04	509.139	1.02649	254.57	42	14.1	1	0
1	25	4	2	34	38	3010	8	10	6.6	4.4	1.65	0.4	184	2.66667	111.515	4.125	490.667	1.06667	196.267	36.7	13	2	0
1	25	1	0	33	37	2525	8	10	13.5	10.3	2.17	0.9	220	4.74654	101.382	2.41111	1044.24	4.27189	939.816	42.3	14.2	1	0
1	28	1	0	32	38	2925	8	10	8.5	6.3	1.5	0.6	189	4.2	126	2.5	793.8	2.52	476.28	28.7	8.8	1	0
1	27	1	0	39	37	2890	8	10	9.4	6.4	2.13	0.7	231	3.00469	108.451	3.04286	694.085	2.10329	485.859	37.8	12.5	1	0
1	35	5	4	27	40	3260	8	10	8.2	5.1	1.97	0.6	239	2.58883	121.32	3.28333	618.731	1.5533	371.239	35.8	12.4	1	0
1	35	7	3	28	40	3925	8	10	8.4	5.8	2.01	0.5	300	2.88557	149.254	4.02	865.672	1.44279	432.836	34.3	11.7	2	0
1	26	1	0	23	36	3080	8	10	11.6	7.1	3.24	1	257	2.19136	79.321	3.24	563.179	2.19136	563.179	39.5	13.3	1	0
1	34	2	1	27	38	3250	8	10	12	8.3	2.98	0.7	294	2.78523	98.6577	4.25714	818.859	1.94966	573.201	30.6	9.9	1	0
1	26	3	0	30	38	2860	8	10	9.1	5.2	3.28	0.6	281	1.58537	85.6707	5.46667	445.488	0.95122	267.293	33.8	11.7	2	0
1	30	1	0	25	38	2750	8	10	10.9	9	1.26	0.6	295	7.14286	234.127	2.1	2107.14	4.28571	1264.29	38.9	12.9	1	0
1	21	1	0	28	37	2915	8	10	7.8	5	2.18	0.5	256	2.29358	117.431	4.36	587.156	1.14679	293.578	38.2	13.1	1	0
1	25	1	0	26	39	2700	8	10	8.4	6.3	1.53	0.4	226	4.11765	147.712	3.825	930.588	1.64706	372.235	37.8	12.9	1	0
1	39	7	3	28	37	2980	8	10	8.3	5.8	1.89	0.5	263	3.06878	139.153	3.78	807.09	1.53439	403.545	35.3	12.2	1	0
1	25	4	3	28	38	2915	8	10	6.1	3.8	1.91	0.4	248	1.98953	129.843	4.775	493.403	0.795812	197.361	36.9	12.3	2	0
1	34	4	3	35	37	2650	8	10	7.1	4.2	2.36	0.4	310	1.77966	131.356	5.9	551.695	0.711864	220.678	35.8	12.1	1	0
1	31	3	2	33	34	3315	7	8	11.2	8.1	2.33	0.6	262	3.47639	112.446	3.88333	910.815	2.08584	546.489	31.2	10.9	1	0
1	33	4	3	29	37	3965	8	10	12.2	8.1	2.95	0.7	198	2.74576	67.1186	4.21429	543.661	1.92203	380.563	35	12	1	0
1	30	3	2	37	41	3740	8	10	9.8	6.5	2	0.3	263	3.25	131.5	6.66667	854.75	0.975	256.425	36.6	12.5	1	0
1	34	3	2	23	39	3470	8	10	11.9	7.9	3.37	0.5	283	2.34421	83.9763	6.74	663.412	1.17211	331.706	32	10.6	1	0
1	21	2	1	27	36	2725	8	10	5.8	4.3	1.06	0.2	257	4.0566	242.453	5.3	1042.55	0.811321	208.509	37.4	13.3	2	0
1	33	6	4	41	39	3065	8	10	8.8	5.3	2.56	0.6	429	2.07031	167.578	4.26667	888.164	1.24219	532.898	38	12.4	2	0
1	33	1	0	29	37	1710	7	9	13.3	10.6	1.85	0.6	256	5.72973	138.378	3.08333	1466.81	3.43784	880.086	36.4	12.4	1	0
1	23	2	1	23	38	3010	8	10	7.9	6	1.49	0.3	298	4.02685	200	4.96667	1200	1.20805	360	33.1	11.4	1	0
1	36	1	0	28	37	3530	5	9	9.1	5.9	2.45	0.6	180	2.40816	73.4694	4.08333	433.469	1.4449	260.082	35.9	11.7	1	1
1	27	4	2	28	40	3300	8	10	7.6	6.2	0.55	0.9	199	11.2727	361.818	0.611111	2243.27	10.1455	2018.95	37.7	12.5	2	0
1	26	2	1	26	40	3030	7	9	18.1	14.8	2.31	0.9	204	6.40693	88.3117	2.56667	1307.01	5.76623	1176.31	39.8	13.5	1	0
1	38	4	3	23	39	3300	8	10	8.6	5.6	2.57	0.4	211	2.17899	82.1012	6.425	459.767	0.871595	183.907	37.4	13.3	1	0
1	35	6	5	26	40	3530	8	10	10.7	7.8	2.15	0.6	289	3.62791	134.419	3.58333	1048.47	2.17674	629.079	37.8	13.2	1	1
1	34	4	2	31	36	3270	8	9	11.2	8.8	1.75	0.5	293	5.02857	167.429	3.5	1473.37	2.51429	736.686	37.6	12.8	2	1
1	22	1	0	34	37	2375	8	10	17.4	13.5	2.78	1	278	4.85612	100	2.78	1350	4.85612	1350	37.5	13.6	1	0
1	24	1	0	29	39	3000	5	9	11.4	7.6	2.64	0.8	326	2.87879	123.485	3.3	938.485	2.30303	750.788	37.2	11.8	2	0
1	36	5	3	30	37	2525	7	9	11.8	8.8	2.03	0.8	276	4.33498	135.961	2.5375	1196.45	3.46798	957.163	40.5	14.1	1	0
1	33	4	2	39	40	3620	8	10	11.2	7.4	2.93	0.7	226	2.5256	77.1331	4.18571	570.785	1.76792	399.549	37.1	12.4	1	0
1	31	1	0	29	40	3400	8	10	7.3	4.4	0.61	2.2	430	7.21311	704.918	0.277273	3101.64	15.8689	6823.61	34.1	10.8	1	0
1	32	4	1	35	41	3350	8	10	10.9	8.1	2.25	0.5	222	3.6	98.6667	4.5	799.2	1.8	399.6	41.2	14.5	2	0
1	37	2	1	27	39	2775	8	10	9.9	6.2	2.58	0.9	173	2.4031	67.0543	2.86667	415.736	2.16279	374.163	37.8	12.5	1	0
1	31	3	2	26	39	3150	8	10	11.8	8.5	2.48	0.6	240	3.42742	96.7742	4.13333	822.581	2.05645	493.548	33.7	11.4	2	0
1	31	1	0	32	39	3385	5	6	10.3	7	2.37	0.7	288	2.95359	121.519	3.38571	850.633	2.06751	595.443	38.6	12.9	2	1
1	23	1	0	27	39	3500	8	10	10	6.9	2	1	275	3.45	137.5	2	948.75	3.45	948.75	40.2	13.6	1	0
1	38	10	5	21	38	3660	8	10	7.2	4.4	2.47	0.3	290	1.78138	117.409	8.23333	516.599	0.534413	154.98	35.9	12.3	1	0
1	23	2	1	42	37	3020	7	9	9.9	6.4	2.91	0.6	264	2.19931	90.7216	4.85	580.619	1.31959	348.371	37.2	13.2	1	0
1	30	4	3	33	36	2800	8	10	11.7	10.4	0.38	0.8	236	27.3684	621.053	0.475	6458.95	21.8947	5167.16	34.5	12.2	2	0
1	26	4	1	25	41	2500	8	9	5.6	3.6	1.62	0.4	179	2.22222	110.494	4.05	397.778	0.888889	159.111	38	12.8	2	0
1	22	1	0	23	40	3315	8	10	5.4	2.7	2.12	0.5	196	1.27358	92.4528	4.24	249.623	0.636792	124.811	36.3	12.5	1	0
1	30	4	2	24	38	3285	8	10	12.3	7.2	3.04	0.9	382	2.36842	125.658	3.37778	904.737	2.13158	814.263	39.8	13.2	1	0
1	27	5	2	31	39	3050	8	10	8.6	5.4	2.54	0.5	260	2.12598	102.362	5.08	552.756	1.06299	276.378	38.1	12.9	1	0
1	24	1	0	31	37	2505	8	10	8.6	6.5	1.59	0.5	228	4.08805	143.396	3.18	932.075	2.04403	466.038	35.1	12	2	0
1	23	4	2	26	37	2700	7	10	10	4.4	4.4	1.1	321	1	72.9545	4	321	1.1	353.1	40.4	14.1	2	0
1	24	2	1	31	40	3250	8	10	8.7	5.1	2.65	0.5	266	1.92453	100.377	5.3	511.925	0.962264	255.962	37.4	12	1	0
1	34	4	3	23	37	2920	7	9	12.5	9.4	2.31	0.6	308	4.06926	133.333	3.85	1253.33	2.44156	752	35.1	12.2	1	0
1	27	5	3	32	39	3080	8	10	6.5	4.4	1.62	0.3	178	2.71605	109.877	5.4	483.457	0.814815	145.037	35.9	12.2	2	0
1	33	6	3	28	34	2460	6	8	8.2	5.3	2.1	0.7	242	2.52381	115.238	3	610.762	1.76667	427.533	37.3	13	2	0
1	24	1	0	30	40	4230	7	9	12	8.4	2.31	1	312	3.63636	135.065	2.31	1134.55	3.63636	1134.55	36.5	12	1	0
1	23	3	1	23	38	3050	8	9	9.8	6.6	2.56	0.6	219	2.57812	85.5469	4.26667	564.609	1.54687	338.766	37.1	12.6	1	0
1	24	1	0	27	40	3480	8	10	17.6	12.8	2.97	1.7	431	4.30976	145.118	1.74706	1857.51	7.3266	3157.76	34.2	12	1	0
1	32	4	1	29	39	3060	8	10	9.5	6.2	2.45	0.7	376	2.53061	153.469	3.5	951.51	1.77143	666.057	34.9	11.9	2	0
1	28	3	1	31	39	3575	8	10	7.3	4.4	1.69	1.1	202	2.60355	119.527	1.53636	525.917	2.86391	578.509	38.9	13.3	2	0
1	26	3	2	25	37	3385	8	10	12.6	9.1	2.77	0.6	283	3.2852	102.166	4.61667	929.711	1.97112	557.827	35.2	12.2	2	0
1	24	2	1	23	37	3115	7	9	10.8	7.1	2.81	0.6	401	2.52669	142.705	4.68333	1013.2	1.51601	607.922	36.5	12.1	1	0
1	35	3	1	25	37	2200	8	10	7.2	5.1	1.58	0.5	210	3.22785	132.911	3.16	677.848	1.61392	338.924	34.9	11.7	1	0
1	24	1	0	28	39	3300	8	10	9	5.1	2.94	0.8	299	1.73469	101.701	3.675	518.673	1.38776	414.939	32.3	10.3	2	0
1	22	1	0	22	40	2590	8	10	8.2	4.4	2.26	1.4	387	1.9469	171.239	1.61429	753.451	2.72566	1054.83	35.6	12	1	0
1	28	2	1	27	38	3325	8	10	8.9	6.8	1.58	0.5	138	4.3038	87.3418	3.16	593.924	2.1519	296.962	41.6	13.5	2	0
1	29	3	1	26	40	3750	8	10	13.3	9.1	3.11	0.8	240	2.92605	77.1704	3.8875	702.251	2.34084	561.801	36.1	12.3	1	0
1	28	3	1	28	38	3095	8	10	7.9	5.4	1.94	0.4	291	2.78351	150	4.85	810	1.1134	324	35	12	1	0
1	35	6	3	33	40	2775	8	10	7	4.2	1.87	0.8	254	2.24599	135.829	2.3375	570.481	1.79679	456.385	35.3	11.6	2	0
1	28	4	3	28	40	3200	8	10	7.1	4.6	1.98	0.4	377	2.32323	190.404	4.95	875.859	0.929293	350.343	38.5	13	1	0
1	27	3	1	24	38	2870	7	9	11.8	7.5	3.11	1	316	2.41158	101.608	3.11	762.058	2.41158	762.058	37.9	12.7	1	0
1	28	1	0	25	40	2965	8	10	9.8	6.3	2.63	0.8	314	2.39544	119.392	3.2875	752.167	1.91635	601.734	36	12	1	0
1	24	3	2	24	40	4145	8	10	9.8	6.8	2.29	0.6	304	2.96943	132.751	3.81667	902.707	1.78166	541.624	38.7	13.4	2	0
1	24	5	4	25	40	3200	8	10	6.9	4.4	1.89	0.5	207	2.32804	109.524	3.78	481.905	1.16402	240.952	34.2	11.7	2	0
1	28	4	2	22	41	4080	8	10	8.4	6.4	1.48	0.5	175	4.32432	118.243	2.96	756.757	2.16216	378.378	37.4	13.1	1	0
1	29	3	2	26	36	2900	8	10	8.7	6.1	1.89	0.5	253	3.22751	133.862	3.78	816.561	1.61376	408.28	37.5	12.7	1	0
1	20	2	1	28	36	2880	8	10	10.2	7.3	2.05	0.5	245	3.56098	119.512	4.1	872.439	1.78049	436.22	37.9	13.5	2	0
1	29	4	2	29	39	3420	8	10	8.4	5.3	2.46	0.5	173	2.15447	70.3252	4.92	372.724	1.07724	186.362	40.6	13.6	2	0
1	39	5	1	32	40	3240	8	10	7	4.5	1.89	0.5	217	2.38095	114.815	3.78	516.667	1.19048	258.333	30.9	10.9	1	0
1	21	2	1	24	40	3265	8	10	11.3	7.7	2.89	0.6	314	2.66436	108.651	4.81667	836.609	1.59862	501.965	38.3	12.6	1	0
1	35	5	4	32	39	3190	8	10	7.4	5.8	1.14	0.4	219	5.08772	192.105	2.85	1114.21	2.03509	445.684	35.2	11.9	1	0
1	23	1	0	31	37	2550	8	10	10.4	8	1.86	0.5	235	4.30108	126.344	3.72	1010.75	2.15054	505.376	32.1	10.6	1	0
1	28	3	1	26	40	3445	8	10	10.7	8.1	1.91	0.4	299	4.24084	156.545	4.775	1268.01	1.69634	507.204	41.8	14.7	2	0
1	29	3	2	32	38	2760	7	9	12.2	8.4	2.51	0.3	221	3.34661	88.0478	8.36667	739.602	1.00398	221.88	35.9	12.2	1	0
1	26	1	0	29	39	3250	8	10	8.6	6.1	1.9	0.4	187	3.21053	98.4211	4.75	600.368	1.28421	240.147	36.4	12.7	2	0
1	23	2	1	37	39	2915	8	10	6.5	4	1.49	0.9	212	2.68456	142.282	1.65556	569.128	2.41611	512.215	35.9	10.8	1	0
1	27	1	0	30	39	2800	8	10	6.8	3.6	2.19	0.5	296	1.64384	135.16	4.38	486.575	0.821918	243.288	41.1	13.8	2	0
1	32	6	5	33	38	3390	8	10	6.1	3.9	1.69	0.4	232	2.30769	137.278	4.225	535.385	0.923077	214.154	42.7	13.9	1	0
1	32	4	3	43	40	3650	8	10	7.2	4.6	1.95	0.5	299	2.35897	153.333	3.9	705.333	1.17949	352.667	36.3	12.9	2	0
1	26	2	1	30	40	3860	8	10	7.4	5.5	1.4	0.4	207	3.92857	147.857	3.5	813.214	1.57143	325.286	40.8	15.1	2	0
1	29	3	1	40	38	3100	8	10	8.3	5.3	2.34	0.4	285	2.26496	121.795	5.85	645.513	0.905983	258.205	39.1	12.9	1	0
1	35	1	0	30	40	3545	8	10	10	6.3	2.96	0.7	283	2.12838	95.6081	4.22857	602.331	1.48986	421.632	36.2	12.3	1	0
1	30	4	3	29	38	3350	7	9	9.4	6.1	2.56	0.6	376	2.38281	146.875	4.26667	895.938	1.42969	537.562	41	13.2	2	0
1	32	1	0	35	35	2200	1	3	8.4	4.6	2.74	0.5	293	1.67883	106.934	5.48	491.898	0.839416	245.949	37.4	12.6	2	1
1	25	2	1	41	33	1850	8	9	7.6	5.3	1.53	0.7	302	3.46405	197.386	2.18571	1046.14	2.42484	732.301	37	12.1	2	0
1	28	1	0	25	39	3400	5	7	11.9	8.4	2.38	1	295	3.52941	123.95	2.38	1041.18	3.52941	1041.18	36.4	11.7	1	0
1	35	7	4	32	39	3360	8	10	11.2	8.2	1.96	0.4	289	4.18367	147.449	4.9	1209.08	1.67347	483.633	42.9	14.5	1	0
1	34	2	1	42	37	2950	8	10	14.4	10.2	3.02	1.3	395	3.37748	130.795	2.32308	1334.11	4.39073	1734.34	41.4	14	1	0
1	28	4	3	32	39	3400	7	9	8.1	4.4	2.92	0.4	238	1.50685	81.5068	7.3	358.63	0.60274	143.452	39.3	13.5	1	0
1	26	3	1	38	40	3390	8	10	10.2	6	3.41	0.6	324	1.75953	95.0147	5.68333	570.088	1.05572	342.053	37.2	12.1	1	0
1	21	1	0	35	39	3115	8	10	7.5	3.5	2.65	1.1	226	1.32075	85.283	2.40909	298.491	1.45283	328.34	37.8	12.8	1	0
1	22	1	0	28	36	3340	8	10	9.7	6.3	2.36	0.7	320	2.66949	135.593	3.37143	854.237	1.86864	597.966	36.5	12.8	1	0
1	24	2	1	32	39	3000	8	10	10.5	6.8	2.82	0.6	241	2.41135	85.461	4.7	581.135	1.44681	348.681	37.8	12.7	1	0
1	23	4	1	32	39	3100	8	10	5.3	3.2	1.83	0.2	245	1.74863	133.88	9.15	428.415	0.349727	85.6831	33	10.1	1	0
1	26	3	1	30	39	3650	8	10	7.8	5.4	1.74	0.5	268	3.10345	154.023	3.48	831.724	1.55172	415.862	36.8	12.3	2	1
1	32	4	2	34	38	2720	7	9	10.9	9.6	1.56	0.7	265	6.15385	169.872	2.22857	1630.77	4.30769	1141.54	37.9	12.7	2	1
1	26	3	2	35	37	2390	8	10	10.4	7.8	1.71	1.7	209	4.5614	122.222	1.00588	953.333	7.75439	1620.67	40	13.9	1	0
1	29	2	1	29	39	2980	8	10	14.1	11.3	2	0.6	304	5.65	152	3.33333	1717.6	3.39	1030.56	35.4	12.1	1	0
1	22	2	1	35	37	2970	8	10	14.4	10.5	2.31	0.5	365	4.54545	158.009	4.62	1659.09	2.27273	829.545	37.3	11.5	2	0
1	28	3	2	31	39	3105	8	10	8.9	6.1	2.13	0.5	194	2.86385	91.0798	4.26	555.587	1.43192	277.793	35.9	12.3	1	0
1	23	1	0	25	38	2340	7	8	10.1	6.7	2.77	0.5	175	2.41877	63.1769	5.54	423.285	1.20939	211.643	38.7	13.4	1	0
1	28	4	3	33	38	3515	8	10	10	4.4	4.55	0.8	236	0.967033	51.8681	5.6875	228.22	0.773626	182.576	36.7	11.9	2	0
1	29	2	1	41	39	3200	6	8	10.7	7.4	2	0.6	243	3.7	121.5	3.33333	899.1	2.22	539.46	38	13.1	1	0
1	27	2	1	48	38	3295	8	10	11.6	7.8	2.37	0.5	271	3.29114	114.346	4.74	891.899	1.64557	445.949	35.4	12.3	1	0
1	27	3	2	33	40	3410	8	10	7.6	4	2.85	0.6	330	1.40351	115.789	4.75	463.158	0.842105	277.895	35.4	12.1	1	0
1	24	1	0	28	38	2380	8	10	10.2	8.1	1.54	0.5	231	5.25974	150	3.08	1215	2.62987	607.5	37.6	13.1	1	0
1	31	4	1	26	37	2720	8	10	11.6	7.3	3.3	1	262	2.21212	79.3939	3.3	579.576	2.21212	579.576	35	11.4	2	0
1	24	1	0	34	39	3490	8	10	8	4.4	2.74	0.7	294	1.60584	107.299	3.91429	472.117	1.12409	330.482	37.1	12.5	1	0
1	31	2	1	22	38	3370	8	10	7.5	4.4	2.48	0.4	303	1.77419	122.177	6.2	537.581	0.709677	215.032	34	11.7	2	0
1	30	7	3	37	39	3300	8	10	5.5	4	0.91	0.5	283	4.3956	310.989	1.82	1243.96	2.1978	621.978	41.1	14	1	0
1	23	3	1	29	38	3250	8	10	8.4	6	1.69	0.6	246	3.5503	145.562	2.81667	873.373	2.13018	524.024	34.4	11.8	2	0
1	24	1	0	30	39	3000	8	10	7.3	4.1	2.59	0.6	257	1.58301	99.2278	4.31667	406.834	0.949807	244.1	41.3	14.1	1	0
1	29	2	1	34	38	3105	8	10	10.8	7.6	2.31	0.8	280	3.29004	121.212	2.8875	921.212	2.63203	736.97	38.6	12.9	1	0
1	23	2	1	30	37	2505	7	9	10.1	7.4	1.93	0.6	327	3.8342	169.43	3.21667	1253.78	2.30052	752.269	38.5	12.9	1	0
1	26	2	0	41	37	2460	7	9	11.8	3.4	3.1	0.7	270	1.09677	87.0968	4.42857	296.129	0.767742	207.29	33.4	11.7	1	0
1	25	1	0	34	41	3680	8	10	12.8	6.1	2.05	0.5	218	2.97561	106.341	4.1	648.683	1.4878	324.341	33.7	11.1	1	0
1	38	3	0	30	38	2970	7	9	10.8	5.6	3.03	0.4	389	1.84818	128.383	7.575	718.944	0.739274	287.578	24.8	8.6	1	0
1	37	1	0	35	41	2830	6	8	9.8	2.9	1.69	0.4	200	1.71598	118.343	4.225	343.195	0.686391	137.278	36.4	12	1	0
1	35	1	0	30	39	3000	8	10	9.4	5.4	3.4	0.7	230	1.58824	67.6471	4.85714	365.294	1.11176	255.706	31.2	10	1	0
1	34	1	0	40	41	3800	8	10	12.8	9	2.34	0.8	296	3.84615	126.496	2.925	1138.46	3.07692	910.769	25.1	8.3	1	0
1	35	2	0	26	41	3670	8	10	11.8	8	1.57	0.6	164	5.09554	104.459	2.61667	835.669	3.05732	501.401	27.8	9.7	1	0
1	30	1	0	27	37	2300	6	8	10.9	6.9	1.44	0.2	208	4.79167	144.444	7.2	996.667	0.958333	199.333	27.4	9.5	2	0
1	24	1	0	29	41	3500	8	10	9.8	6.6	2.71	0.5	282	2.43542	104.059	5.42	686.79	1.21771	343.395	28.1	9.8	2	0
1	25	2	0	35	37	2400	8	10	8.5	5.5	1.55	0.5	274	3.54839	176.774	3.1	972.258	1.77419	486.129	29.2	9.9	1	0
1	25	1	0	25	37	2640	8	10	14.3	9.5	4.59	0.2	401	2.06972	87.3638	22.95	829.956	0.413943	165.991	30.1	10	1	0
1	34	3	0	22	37	2640	7	9	9.8	5	1.41	0.4	228	3.5461	161.702	3.525	808.511	1.41844	323.404	30.1	10.4	1	0
1	21	1	0	24	40	3140	8	10	12.8	7.1	1.9	0.3	223	3.73684	117.368	6.33333	833.316	1.12105	249.995	28.4	9.8	2	0
1	24	1	0	25	41	3500	8	10	12.1	6	1.54	0.4	230	3.8961	149.351	3.85	896.104	1.55844	358.442	28.1	9.3	2	0
1	42	2	0	41	39	3350	8	10	12.1	8.8	2.14	0.6	283	4.11215	132.243	3.56667	1163.74	2.46729	698.243	28.1	10.7	1	0
1	21	2	0	31	41	3690	8	10	12.1	4.9	1.21	0.4	233	4.04959	192.562	3.025	943.554	1.61983	377.421	25.2	8.9	1	0
1	25	1	0	34	41	3870	8	10	10.4	5.7	3.04	0.1	401	1.875	131.908	30.4	751.875	0.1875	75.1875	22.4	7	1	0
1	25	1	0	30	41	3130	8	10	10.2	5.5	2.56	0.4	389	2.14844	151.953	6.4	835.742	0.859375	334.297	30.1	10	2	0
1	22	1	0	29	41	3660	8	10	14.5	9	1.57	0.3	256	5.73248	163.057	5.23333	1467.52	1.71975	440.255	23.4	8	2	0
2	31	1	0	26	38	2410	7	9	8.2	6	1.56	0.6	219	3.84615	140.385	2.6	842.308	2.30769	505.385	31.8	10.6	1	0
2	23	1	0	41	38	2860	7	9	5.7	3.7	2.26	0.6	229	1.63717	101.327	3.76667	374.912	0.982301	224.947	31.5	10.5	1	0
2	26	1	0	23	37	3720	8	10	8.4	6.2	2.54	0.4	352	2.44094	138.583	6.35	859.213	0.976378	343.685	24.8	8.3	2	0
2	32	2	1	35	37	2730	8	10	7.1	5	3.95	0.6	336	1.26582	85.0633	6.58333	425.316	0.759494	255.19	32.74	11	2	0
2	34	4	2	27	32	1950	3	5	9.8	7.3	1.87	0.5	180	3.90374	96.2567	3.74	702.674	1.95187	351.337	31.4	10.8	1	1
2	31	1	0	29	37	4250	8	10	8.6	6.5	1.72	0.8	234	3.77907	136.047	2.15	884.302	3.02326	707.442	32.8	10.7	1	0
2	35	2	0	37	33	1750	8	10	7.5	5.2	2.81	0.5	255	1.85053	90.7473	5.62	471.886	0.925267	235.943	31.8	10.6	2	0
2	42	6	0	24	39	3870	8	10	8.1	7.1	2.63	0.3	295	2.69962	112.167	8.76667	796.388	0.809886	238.916	30.7	10.9	2	0
2	34	9	2	34	35	2100	5	7	10.6	8.1	2.7	0.7	262	3	97.037	3.85714	786	2.1	550.2	33.7	11.5	2	1
2	21	1	0	30	31	1500	3	5	9.6	7.5	2.23	0.7	277	3.36323	124.215	3.18571	931.614	2.35426	652.13	32.7	10.5	1	1
2	36	2	1	34	34	1720	3	5	7.9	5.7	2	1.2	346	2.85	173	1.66667	986.1	3.42	1183.32	34.2	11.3	1	1
2	29	3	1	32	33	1820	3	5	4.5	2.4	1.93	0.6	193	1.24352	100	3.21667	240	0.746114	144	33.2	11.4	1	1
2	26	3	2	34	30	930	3	5	6.8	4.8	1.8	0.6	262	2.66667	145.556	3	698.667	1.6	419.2	34.1	7.2	2	1
2	40	1	0	30	32	1520	3	5	6.2	4.3	1.95	0.4	271	2.20513	138.974	4.875	597.59	0.882051	239.036	33.1	10.3	2	1
2	25	2	0	35	35	1940	5	7	8.4	6.6	2.45	0.6	229	2.69388	93.4694	4.08333	616.898	1.61633	370.139	31.2	10.8	1	1
2	38	2	1	30	37	2770	7	9	9.3	7.6	2.48	0.8	296	3.06452	119.355	3.1	907.097	2.45161	725.677	34.3	11.9	1	0
2	28	2	1	42	39	2910	8	10	5.1	3.9	2.5	0.3	276	1.56	110.4	8.33333	430.56	0.468	129.168	28.9	9.9	1	0
2	31	1	0	27	38	3370	6	8	8.7	6.7	3.24	0.6	271	2.0679	83.642	5.4	560.401	1.24074	336.241	25.4	8.4	1	0
2	21	1	0	34	41	3560	5	7	8.4	6.2	2.23	0.7	203	2.78027	91.0314	3.18571	564.395	1.94619	395.076	37.2	12.4	2	0
2	25	1	0	31	32	1680	5	7	9.2	7.2	1.87	1.1	203	3.85027	108.556	1.7	781.604	4.23529	859.765	38.1	12.3	2	0
2	26	1	0	35	28	860	3	5	6.8	4.8	1.16	0.4	319	4.13793	275	2.9	1320	1.65517	528	22.6	7.6	1	1
2	28	2	1	26	36	1740	5	7	7.2	5.1	2.87	0.6	330	1.777	114.983	4.78333	586.411	1.0662	351.847	36.4	12.2	1	0
2	37	1	0	35	30	960	3	5	8.4	6	2.17	1	239	2.76498	110.138	2.17	660.829	2.76498	660.829	30.4	10.1	2	1
2	41	3	2	28	37	3760	8	10	6.2	4.9	2.2	0.5	339	2.22727	154.091	4.4	755.045	1.11364	377.523	28.4	8.4	2	0
2	40	4	3	26	38	3430	8	10	8.7	5	1.7	0.4	207	2.94118	121.765	4.25	608.824	1.17647	243.529	36.2	12.4	1	0
2	30	2	1	34	31	1630	6	8	8.4	2.8	1.64	0.5	201	1.70732	122.561	3.28	343.171	0.853659	171.585	30.7	10.7	1	0
2	38	2	1	38	35	2590	7	9	8.5	6.4	2.26	0.5	223	2.83186	98.6726	4.52	631.504	1.41593	315.752	28.2	9.9	1	0
2	28	1	0	39	30	1230	5	7	5.4	3.8	2.08	0.6	249	1.82692	119.712	3.46667	454.904	1.09615	272.942	33.4	11.6	2	1
2	31	4	3	31	34	2690	7	9	8.2	4.3	1.92	0.6	234	2.23958	121.875	3.2	524.062	1.34375	314.437	30.2	10	2	0
2	30	4	2	36	35	3040	8	10	7.1	4.9	2.19	0.5	218	2.23744	99.5434	4.38	487.763	1.11872	243.881	28.4	8.6	1	0
2	32	3	2	35	35	1950	6	8	7.2	5.9	2.76	0.6	250	2.13768	90.5797	4.6	534.42	1.28261	320.652	30.7	10.3	2	1
2	36	1	0	45	31	1010	5	7	5.2	3.3	2.02	0.9	308	1.63366	152.475	2.24444	503.168	1.4703	452.851	30.3	10.1	1	0
2	25	1	0	35	35	2400	7	9	6.8	4.3	2.51	0.5	332	1.71315	132.271	5.02	568.765	0.856574	284.382	29.2	9.8	2	0
2	22	1	0	39	36	2040	5	7	10.4	7.6	2.03	0.4	263	3.74384	129.557	5.075	984.631	1.49754	393.852	29.1	9.6	1	1
2	33	1	0	30	37	3680	8	10	5.6	3.6	2.41	0.4	305	1.49378	126.556	6.025	455.602	0.59751	182.241	30.7	9.8	2	0
2	19	2	1	31	35	2560	7	9	5.7	2.8	2.37	0.7	314	1.18143	132.489	3.38571	370.97	0.827004	259.679	29.2	9.9	2	0
2	38	1	0	32	34	2080	3	5	5.2	3	2.7	0.6	340	1.11111	125.926	4.5	377.778	0.666667	226.667	31.2	10.5	1	1
2	34	2	1	32	34	2118	5	7	7.4	5.2	2.8	0.6	271	1.85714	96.7857	4.66667	503.286	1.11429	301.971	37.4	11.5	1	0
2	43	2	1	30	35	2050	5	7	6.2	3.4	1.93	0.5	158	1.76166	81.8653	3.86	278.342	0.880829	139.171	30.4	10.1	2	0
2	37	7	3	30	36	2160	5	7	8.4	6.9	3.01	0.4	319	2.29236	105.98	7.525	731.262	0.916944	292.505	28.4	9.5	2	0
2	24	2	1	26	35	2800	7	9	8.5	6.4	2.73	0.7	256	2.34432	93.7729	3.9	600.147	1.64103	420.103	27.9	9.4	1	0
2	24	4	0	43	35	1950	7	9	6.8	4.3	1.97	0.7	250	2.18274	126.904	2.81429	545.685	1.52792	381.98	35.2	11.1	1	0
2	26	1	0	31	36	2480	8	10	7.4	5	2.5	0.7	268	2	107.2	3.57143	536	1.4	375.2	33.1	10.2	1	0
2	24	2	0	45	33	2100	7	9	7.6	5.7	2.5	0.6	243	2.28	97.2	4.16667	554.04	1.368	332.424	32.1	10	2	0
2	28	1	0	36	32	1560	6	8	5.9	3.3	2.2	0.5	252	1.5	114.545	4.4	378	0.75	189	33.2	11.2	2	0
2	23	1	0	32	34	1980	6	8	8.2	5.4	2.51	0.6	262	2.15139	104.382	4.18333	563.665	1.29084	338.199	30.6	10	1	0
2	29	2	1	39	33	2010	7	9	4.9	2.6	1.06	0.2	107	2.45283	100.943	5.3	262.453	0.490566	52.4906	33.4	11.2	1	0
2	22	1	0	30	35	2700	8	10	8.2	5.2	2.03	0.5	230	2.56158	113.3	4.06	589.163	1.28079	294.581	30.7	10	2	0
2	20	1	0	35	33	1380	3	5	7.2	4.7	2.63	0.6	360	1.78707	136.882	4.38333	643.346	1.07224	386.008	28.1	8.4	2	1
2	23	5	3	28	39	3410	7	9	8.5	5.2	1.9	0.5	232	2.73684	122.105	3.8	634.947	1.36842	317.474	39.5	13	1	0
2	21	1	0	45	39	2920	8	10	8	5.5	1.78	0.5	270	3.08989	151.685	3.56	834.27	1.54494	417.135	22.3	7.8	1	0
2	35	4	3	47	38	3130	8	10	6.2	3.1	1.96	0.6	286	1.58163	145.918	3.26667	452.347	0.94898	271.408	33.4	11.3	1	0
2	27	1	0	26	34	1650	5	7	8.2	3.8	2.29	0.6	281	1.65939	122.707	3.81667	466.288	0.995633	279.773	31.2	10.1	1	0
2	25	3	1	29	32	1680	5	7	6.2	3.4	2.94	0.4	232	1.15646	78.9116	7.35	268.299	0.462585	107.32	32.5	11.6	1	1
2	26	1	0	35	33	1610	5	7	6.8	4.3	1.44	0.4	202	2.98611	140.278	3.6	603.194	1.19444	241.278	29.5	9.8	1	0
2	41	4	1	30	35	2360	8	10	5.9	3.3	1.77	0.3	190	1.86441	107.345	5.9	354.237	0.559322	106.271	30.2	10	2	0
2	27	4	2	31	38	2830	8	10	8.4	6.5	3.53	0.5	423	1.84136	119.83	7.06	778.895	0.92068	389.448	29.2	9.4	2	0
2	40	4	2	24	37	3170	8	10	8.3	6.5	3.02	0.5	260	2.15232	86.0927	6.04	559.603	1.07616	279.801	30.2	10.6	1	0
2	27	3	2	36	38	3340	8	10	8.4	6.1	2.61	0.6	289	2.33716	110.728	4.35	675.441	1.4023	405.264	25.4	7.5	1	0
2	30	4	2	32	35	2150	5	7	5.6	2.2	1.36	0.3	265	1.61765	194.853	4.53333	428.676	0.485294	128.603	26.8	8.41	2	0
2	34	3	2	28	33	1590	5	7	6.8	4.2	2.46	0.4	272	1.70732	110.569	6.15	464.39	0.682927	185.756	29.2	9.5	2	0
2	25	2	1	26	33	1050	3	5	4.8	2.8	2.6	0.4	154	1.07692	59.2308	6.5	165.846	0.430769	66.3385	36.4	12.3	1	1
2	42	2	1	33	37	2460	8	10	9.1	7.1	1.9	0.6	281	3.73684	147.895	3.16667	1050.05	2.24211	630.032	26.9	8.9	1	0
2	24	1	0	19	38	2220	6	8	5.9	3.5	1.55	0.4	188	2.25806	121.29	3.875	424.516	0.903226	169.806	33.4	11.7	1	0
2	33	4	3	31	39	2930	6	8	6.7	4.9	2.79	0.4	335	1.75627	120.072	6.975	588.351	0.702509	235.341	28.6	9.8	2	0
2	30	3	2	39	35	3450	8	10	8.2	6.5	3.1	0.7	313	2.09677	100.968	4.42857	656.29	1.46774	459.403	29.2	9.5	2	0
2	29	1	0	29	35	1650	3	5	5.4	3.5	3.4	0.3	297	1.02941	87.3529	11.3333	305.735	0.308824	91.7206	32.1	10.6	1	1
2	34	1	0	26	38	3370	8	10	7.5	5.9	2.68	0.9	238	2.20149	88.806	2.97778	523.955	1.98134	471.56	32.4	11.5	1	0
2	28	1	0	30	34	1930	6	8	8.5	5.1	2.8	0.5	302	1.82143	107.857	5.6	550.071	0.910714	275.036	30.1	9.9	2	0
2	35	1	0	27	40	3280	8	10	8.2	5.8	2.59	0.6	273	2.23938	105.405	4.31667	611.351	1.34363	366.811	28.9	9.6	2	0
2	23	2	0	31	32	1770	5	7	6.5	3.7	2.78	0.6	270	1.33094	97.1223	4.63333	359.353	0.798561	215.612	32.4	11.4	1	1
2	33	1	0	27	38	2870	8	10	8.2	6.8	3.3	0.6	330	2.06061	100	5.5	680	1.23636	408	33.4	11.6	1	0
2	25	1	0	34	38	2970	8	10	7.1	6	2.3	0.5	327	2.6087	142.174	4.6	853.043	1.30435	426.522	32.4	10	1	0
2	22	2	1	31	39	3500	8	10	6.2	5	2.1	0.3	344	2.38095	163.81	7	819.048	0.714286	245.714	30.1	10	2	0
2	38	2	1	28	38	2820	8	10	8.2	6.6	3.17	0.7	418	2.08202	131.861	4.52857	870.284	1.45741	609.199	26.4	8	2	0
2	36	2	1	33	36	1900	5	7	11	9	1.55	0.7	246	5.80645	158.71	2.21429	1428.39	4.06452	999.871	30.6	9.5	2	0
2	30	7	5	31	38	3950	8	10	6.6	4.6	2.1	0.4	326	2.19048	155.238	5.25	714.095	0.87619	285.638	30	9.3	1	0
2	31	5	2	23	37	3450	8	10	6.2	3.5	1.73	0.3	194	2.02312	112.139	5.76667	392.486	0.606936	117.746	24.1	7.8	1	0
2	39	2	1	32	32	1560	5	7	6.8	4.8	3.16	0.8	195	1.51899	61.7089	3.95	296.203	1.21519	236.962	36.1	12	2	1
2	37	3	0	31	38	3010	8	10	8.1	6.2	2.25	0.4	270	2.75556	120	5.625	744	1.10222	297.6	32.5	11.3	2	0
2	34	3	1	42	39	3470	8	10	7.9	5.4	2.3	0.5	237	2.34783	103.043	4.6	556.435	1.17391	278.217	32	11	1	0
2	28	1	0	32	37	2520	8	10	6.5	3.7	2.49	0.5	173	1.48594	69.4779	4.98	257.068	0.742972	128.534	32.4	10.5	1	0
2	25	2	1	31	38	3060	8	10	6.8	4.4	2.6	0.4	278	1.69231	106.923	6.5	470.462	0.676923	188.185	33.1	9.5	2	0
2	27	1	0	29	36	2600	6	8	5.7	3.7	2.73	0.4	234	1.35531	85.7143	6.825	317.143	0.542125	126.857	30.2	8.9	2	0
2	26	1	0	42	35	2370	8	10	7.2	5.2	2.2	0.4	326	2.36364	148.182	5.5	770.545	0.945455	308.218	31.2	9.9	1	0
2	30	2	0	32	36	2740	7	9	6.8	4.8	1.7	0.3	260	2.82353	152.941	5.66667	734.118	0.847059	220.235	36.4	12.4	1	0
2	26	1	0	31	40	3390	8	10	8.1	6.8	2.44	0.2	356	2.78689	145.902	12.2	992.131	0.557377	198.426	30.6	10.2	2	0
2	27	4	2	30	37	2510	5	7	7.6	5.7	2.2	0.6	280	2.59091	127.273	3.66667	725.455	1.55455	435.273	29.8	9.6	2	1
2	42	4	3	26	37	3710	4	6	7.8	5.8	1.21	0.2	183	4.79339	151.24	6.05	877.19	0.958678	175.438	30.1	10	1	0
2	32	5	3	26	33	2560	7	9	7.9	5.6	1.55	0.6	154	3.6129	99.3548	2.58333	556.387	2.16774	333.832	28.2	9.1	1	0
2	30	2	1	38	40	4430	7	9	6.8	4.6	1.24	0.8	173	3.70968	139.516	1.55	641.774	2.96774	513.419	30.6	10.1	1	0
2	37	5	2	32	38	2780	7	9	6.4	5.8	1.66	0.4	288	3.49398	173.494	4.15	1006.27	1.39759	402.506	33.2	11.9	1	0
2	36	5	5	28	38	1640	5	7	6.8	4.6	1.73	0.4	249	2.65896	143.931	4.325	662.081	1.06358	264.832	34.2	12.7	2	0
2	29	4	1	33	36	2020	7	9	9.8	7.2	1.67	0.5	259	4.31138	155.09	3.34	1116.65	2.15569	558.323	28.2	9.4	2	0
2	38	4	3	29	36	3040	7	9	8.2	4.8	3.27	0.4	291	1.46789	88.9908	8.175	427.156	0.587156	170.862	27.6	8.87	2	0
2	30	2	1	30	37	3280	8	10	9.2	6	2.3	0.5	162	2.6087	70.4348	4.6	422.609	1.30435	211.304	31.5	10.5	1	0
2	34	2	1	37	37	2110	5	7	6.3	4.2	1.68	0.3	288	2.5	171.429	5.6	720	0.75	216	25.2	8.3	1	0
2	22	1	0	45	37	2380	5	7	7.2	4.5	2	0.6	191	2.25	95.5	3.33333	429.75	1.35	257.85	28.2	9.5	2	0
2	36	3	1	36	37	3190	6	8	14.3	9.2	4.47	0.7	275	2.05817	61.5213	6.38571	565.996	1.44072	396.197	37.2	12.6	1	0
2	21	2	1	32	40	3540	7	9	10.2	7.7	1.6	0.6	186	4.8125	116.25	2.66667	895.125	2.8875	537.075	32.1	10.4	1	0
2	32	3	2	27	37	3640	7	9	11.2	8.7	2.78	0.7	337	3.1295	121.223	3.97143	1054.64	2.19065	738.248	28.2	9.4	2	0
2	23	5	3	32	37	2470	5	7	11.2	7.2	3.1	0.6	289	2.32258	93.2258	5.16667	671.226	1.39355	402.735	36.2	12.7	1	0
2	42	6	5	25	37	3400	6	8	6.2	4	1.69	0.5	331	2.36686	195.858	3.38	783.432	1.18343	391.716	25.6	8.88	1	0
2	22	1	0	32	37	2300	5	7	9.2	7	1.25	0.8	251	5.6	200.8	1.5625	1405.6	4.48	1124.48	30.2	10	2	0
2	30	3	2	32	30	1220	5	7	7.2	4.2	2.54	0.3	438	1.65354	172.441	8.46667	724.252	0.496063	217.276	31.2	10.5	1	0
2	35	4	3	30	37	2570	7	9	7.3	4.2	1.4	0.7	210	3	150	2	630	2.1	441	21.7	7.4	1	0
2	40	2	1	39	35	1790	5	7	8.2	5	2.42	0.6	290	2.06612	119.835	4.03333	599.174	1.23967	359.504	30.1	10.7	2	0
2	21	1	0	23	35	2590	7	9	6.4	4	1.8	0.6	270	2.22222	150	3	600	1.33333	360	30.6	10.8	1	0
2	32	2	1	44	37	2680	8	10	11.5	7.6	3.4	0.5	228	2.23529	67.0588	6.8	509.647	1.11765	254.824	30.2	10.4	2	0
2	25	1	0	27	31	1070	5	7	7	3.5	2.1	0.4	352	1.66667	167.619	5.25	586.667	0.666667	234.667	24.2	8.1	2	0
2	31	9	3	25	36	2830	8	10	9.2	6.7	2.6	0.6	315	2.57692	121.154	4.33333	811.731	1.54615	487.038	29.2	9.4	1	0
2	37	3	2	27	36	2260	8	10	11.2	7	3.2	0.5	421	2.1875	131.562	6.4	920.938	1.09375	460.469	28.4	8.9	1	0
2	24	6	3	32	28	1330	5	7	9.1	7	2.05	0.4	414	3.41463	201.951	5.125	1413.66	1.36585	565.463	28.4	9.1	1	1
2	22	1	0	25	36	1760	5	7	5.8	4.7	1.8	0.4	340	2.61111	188.889	4.5	887.778	1.04444	355.111	31.2	9.4	2	0
2	25	2	1	40	38	3120	8	10	5.7	5	1.91	0.4	348	2.6178	182.199	4.775	910.995	1.04712	364.398	30.5	10	2	0
2	38	2	0	35	32	1520	5	7	10.2	7.1	2.5	0.5	289	2.84	115.6	5	820.76	1.42	410.38	30.6	10.2	2	1
2	25	1	0	23	34	1850	8	10	8.4	4.6	2.39	0.5	275	1.92469	115.063	4.78	529.289	0.962343	264.644	33.2	11.2	1	0
2	31	3	2	32	35	2470	5	7	5.8	2.4	2.2	0.4	238	1.09091	108.182	5.5	259.636	0.436364	103.855	28.5	9	2	1
2	25	1	0	32	36	2150	8	10	6.8	4.2	1.6	0.4	284	2.625	177.5	4	745.5	1.05	298.2	33.4	11.8	1	0
2	41	4	3	42	36	3150	8	10	7.1	4.4	1.53	0.4	225	2.87582	147.059	3.825	647.059	1.15033	258.824	36.2	12.2	1	0
2	41	2	1	32	37	3050	5	7	9.7	7.5	2.1	0.5	258	3.57143	122.857	4.2	921.429	1.78571	460.714	34.5	11.5	2	1
2	23	1	0	42	35	2130	5	7	13.2	7.8	4.5	0.9	311	1.73333	69.1111	5	539.067	1.56	485.16	28.4	9.1	1	1
2	33	1	0	34	34	2160	8	10	7.8	4.7	2.7	0.4	300	1.74074	111.111	6.75	522.222	0.696296	208.889	30.2	10.3	1	0
2	21	1	0	35	34	2120	4	6	7.2	5.4	1.82	0.7	314	2.96703	172.527	2.6	931.648	2.07692	652.154	33.4	11.4	2	0
2	26	1	0	29	39	3820	8	10	9.4	7.6	1.3	0.6	366	5.84615	281.538	2.16667	2139.69	3.50769	1283.82	25.6	8.6	1	0
2	35	4	0	28	38	2670	8	10	11.7	8.2	2.78	0.6	381	2.94964	137.05	4.63333	1123.81	1.76978	674.288	27.5	8.9	2	0
2	22	3	0	33	38	2960	8	10	11.3	9.6	1.04	0.8	279	9.23077	268.269	1.3	2575.38	7.38462	2060.31	29.5	9.5	2	0
2	32	4	3	45	34	1350	8	10	13.2	10.1	2.12	0.5	256	4.76415	120.755	4.24	1219.62	2.38208	609.811	35.2	12.6	1	0
2	23	1	0	27	39	2450	5	7	7.9	6.1	1.63	0.2	247	3.74233	151.534	8.15	924.356	0.748466	184.871	36.1	12	1	0
2	35	5	4	34	37	2210	8	10	5.6	3.4	1.9	0.3	188	1.78947	98.9474	6.33333	336.421	0.536842	100.926	38.2	13.5	1	0
2	22	2	1	24	41	4030	5	7	12.8	10.8	1.71	0.6	221	6.31579	129.24	2.85	1395.79	3.78947	837.474	25.6	8.7	2	1
2	42	2	0	28	34	1750	8	10	9	6	2.7	0.6	293	2.22222	108.519	4.5	651.111	1.33333	390.667	33.2	11.5	1	0
2	39	2	1	32	37	2630	8	10	14.1	12.7	0.8	0.6	168	15.875	210	1.33333	2667	9.525	1600.2	28.2	7.3	2	0
2	25	1	0	25	40	3390	8	10	9	6	2.31	0.5	346	2.5974	149.784	4.62	898.701	1.2987	449.351	28.2	9.8	1	0
2	26	1	0	24	32	1830	8	10	7.6	5.6	1.63	0.2	153	3.43558	93.865	8.15	525.644	0.687117	105.129	34.2	11.8	1	0
2	37	3	2	30	39	3200	8	10	5.6	3	2.16	0.4	258	1.38889	119.444	5.4	358.333	0.555556	143.333	26.2	8.7	1	0
2	35	3	2	20	36	3070	8	10	9	7	1.7	0.3	219	4.11765	128.824	5.66667	901.765	1.23529	270.529	31.5	10.5	2	0
2	37	3	0	26	36	1870	8	10	7.5	5.7	1.33	0.4	196	4.28571	147.368	3.325	840	1.71429	336	26.2	8.5	2	0
2	24	1	0	22	36	2310	5	7	4.2	3.8	2.07	0.3	185	1.83575	89.372	6.9	339.614	0.550725	101.884	30.9	10.3	1	0
2	22	1	0	23	40	2600	8	10	7.9	4.7	2.4	0.4	228	1.95833	95	6	446.5	0.783333	178.6	34.5	11.5	1	0
2	20	1	0	21	37	3610	8	10	7	4	1.6	0.3	206	2.5	128.75	5.33333	515	0.75	154.5	30	10	2	0
2	24	1	0	25	37	2430	8	10	7.9	5.4	1.9	0.6	231	2.84211	121.579	3.16667	656.526	1.70526	393.916	26.2	8.5	1	0
2	36	4	1	20	34	1900	8	10	9.4	6.7	2	0.5	249	3.35	124.5	4	834.15	1.675	417.075	29.1	9.7	1	0
2	34	2	1	28	34	2300	5	7	8	4.5	2	0.5	243	2.25	121.5	4	546.75	1.125	273.375	34.2	11.7	1	0
2	42	4	3	22	37	3050	8	10	7.1	4.5	2.18	0.4	258	2.06422	118.349	5.45	532.569	0.825688	213.028	30.4	10.5	2	0
2	24	2	1	26	41	3870	8	10	7.5	4.5	2.13	0.6	320	2.11268	150.235	3.55	676.056	1.26761	405.634	29.2	9.5	2	0
2	20	2	0	26	39	2610	8	10	8.1	5.3	1.55	0.3	353	3.41935	227.742	5.16667	1207.03	1.02581	362.11	28.1	8.5	2	0
2	24	1	0	23	37	2470	8	10	5.7	3.3	1.58	0.8	233	2.08861	147.468	1.975	486.646	1.67089	389.316	33.2	11.5	1	0
2	35	4	1	31	35	2740	5	7	9.4	7.2	1.6	0.4	355	4.5	221.875	4	1597.5	1.8	639	28.2	8.9	1	0
2	30	2	0	28	37	3180	8	10	10.9	6.5	2.91	0.5	416	2.23368	142.955	5.82	929.21	1.11684	464.605	29.2	9.6	1	0
2	21	2	1	20	37	3370	8	10	7.8	3.8	3.11	0.5	263	1.22186	84.5659	6.22	321.35	0.610932	160.675	33	11	1	0
2	26	1	0	25	36	1990	8	10	11.6	7.6	3.13	0.7	274	2.42812	87.5399	4.47143	665.304	1.69968	465.712	34.5	11.5	1	0
2	34	6	5	30	38	4080	8	10	12.5	8.2	2.71	0.6	365	3.02583	134.686	4.51667	1104.43	1.8155	662.657	26.4	7.8	2	0
2	30	2	1	28	29	1000	8	10	7.3	4.4	2.22	0.6	287	1.98198	129.279	3.7	568.829	1.18919	341.297	31.2	10.8	2	0
2	27	1	0	26	36	2470	8	10	14.5	9.2	3.44	0.8	343	2.67442	99.7093	4.3	917.326	2.13953	733.86	31.2	10.4	2	0
2	36	8	3	27	39	2960	8	10	7.3	4.1	1.96	0.2	229	2.09184	116.837	9.8	479.031	0.418367	95.8061	33.9	11.3	1	0
2	23	1	0	22	36	2000	7	9	6.6	2.6	2.7	0.4	331	0.962963	122.593	6.75	318.741	0.385185	127.496	28.2	9.4	1	0
2	42	1	0	30	40	3010	7	9	6.7	3.9	1.37	0.4	277	2.84672	202.19	3.425	788.54	1.13869	315.416	29.2	9.7	1	0
2	21	3	1	24	28	590	7	9	6.4	2.9	2.03	0.5	326	1.42857	160.591	4.06	465.714	0.714286	232.857	28.2	9.4	1	0
2	31	3	0	24	39	3190	7	9	8.9	5.2	2.25	0.5	334	2.31111	148.444	4.5	771.911	1.15556	385.956	27.6	9.2	1	0
2	38	5	2	30	37	2370	7	9	10.5	7.4	1.33	0.4	234	5.56391	175.94	3.325	1301.95	2.22556	520.782	29.2	9.9	1	0
2	29	1	0	24	37	3030	7	9	10	6.9	2.6	0.6	284	2.65385	109.231	4.33333	753.692	1.59231	452.215	31.2	10.4	1	0
2	28	8	2	26	38	3740	7	9	10.4	6.8	3.04	0.5	269	2.23684	88.4868	6.08	601.711	1.11842	300.855	34.8	11.6	2	0
2	37	2	1	27	32	1860	7	9	7.2	3.9	1.9	0.5	279	2.05263	146.842	3.8	572.684	1.02632	286.342	30.9	10.3	2	0
2	26	1	0	23	38	3130	7	9	19.6	14.7	2.14	0.7	268	6.86916	125.234	3.05714	1840.93	4.80841	1288.65	31.2	10.3	1	0
2	25	1	0	24	38	3220	7	9	9.2	5.8	1.65	0.7	440	3.51515	266.667	2.35714	1546.67	2.46061	1082.67	29.2	9.7	2	0
2	40	5	4	25	37	3000	7	9	9.6	5.6	1.6	0.5	225	3.5	140.625	3.2	787.5	1.75	393.75	31.8	10.6	2	0
2	33	1	0	26	38	3650	7	9	11.2	7.2	3.05	0.7	453	2.36066	148.525	4.35714	1069.38	1.65246	748.564	30.6	10.2	1	0
2	21	1	0	22	37	3010	7	9	11.2	7.2	2.99	0.6	296	2.40803	98.9967	4.98333	712.776	1.44482	427.666	33.9	11.3	1	0
2	39	1	0	30	41	3000	7	9	5.8	3.1	1.17	0.5	127	2.64957	108.547	2.34	336.496	1.32479	168.248	36.3	12.1	1	0
2	38	2	1	20	38	3020	7	9	9	4	2.4	0.6	297	1.66667	123.75	4	495	1	297	29.2	9.7	2	0
2	26	1	0	21	34	1650	7	9	10.5	6.9	3.04	0.5	387	2.26974	127.303	6.08	878.388	1.13487	439.194	30.3	10.1	2	0
2	34	3	1	20	36	1720	7	9	14.8	10	2.28	0.5	196	4.38596	85.9649	4.56	859.649	2.19298	429.825	33.2	11.4	1	0
2	26	1	0	22	40	2800	7	9	6.6	2.6	2.62	0.4	193	0.992366	73.6641	6.55	191.527	0.396947	76.6107	31.8	10.6	2	1
2	29	4	3	24	35	1830	7	9	10.4	7.6	1.5	0.3	209	5.06667	139.333	5	1058.93	1.52	317.68	30.3	10.1	1	0
2	30	2	1	25	38	1990	6	8	7.6	5.2	1.93	0.3	296	2.6943	153.368	6.43333	797.513	0.80829	239.254	34.2	11.4	1	0
2	39	5	4	26	35	1790	6	8	9.2	6.6	2.16	0.4	185	3.05556	85.6481	5.4	565.278	1.22222	226.111	36.4	12.6	2	0
2	31	3	2	24	38	3780	6	8	9.9	5.5	2.13	0.3	283	2.58216	132.864	7.1	730.751	0.774648	219.225	29.2	9.7	1	0
2	31	2	1	20	40	3780	7	9	8.1	5.2	2.6	0.3	299	2	115	8.66667	598	0.6	179.4	26.2	8.9	1	0
2	28	1	0	24	34	1650	7	9	9.4	5.8	2.01	0.6	304	2.88557	151.244	3.35	877.214	1.73134	526.328	32.1	10.9	2	0
2	36	5	3	24	41	3030	7	9	9.4	5.1	2.9	0.4	297	1.75862	102.414	7.25	522.31	0.703448	208.924	34.5	11.5	1	0
2	20	2	0	35	38	3100	7	9	10.4	5.2	3.3	0.8	366	1.57576	110.909	4.125	576.727	1.26061	461.382	35.1	11.5	1	0
2	25	2	0	23	37	3620	7	9	8.9	4.9	2.5	0.3	297	1.96	118.8	8.33333	582.12	0.588	174.636	25.2	8.4	2	0
2	35	1	0	26	37	3050	7	9	16.8	11.4	2.29	1.1	335	4.97817	146.288	2.08182	1667.69	5.47598	1834.45	27.9	9.3	1	0
2	32	1	0	26	30	1260	7	9	9.6	6.2	2.4	0.6	409	2.58333	170.417	4	1056.58	1.55	633.95	26.1	8.7	2	0
2	32	1	0	27	29	1230	7	9	6.4	3.7	2.1	0.4	206	1.7619	98.0952	5.25	362.952	0.704762	145.181	25.2	8.6	1	0
2	34	3	2	24	34	1600	7	9	6.9	4.9	1.67	0.3	164	2.93413	98.2036	5.56667	481.198	0.88024	144.359	37.2	12.8	2	0
2	31	2	1	20	31	1420	6	8	10.5	5.7	3.86	0.9	431	1.47668	111.658	4.28889	636.451	1.32902	572.806	30.1	10	1	0
2	27	2	0	26	31	1520	8	10	11.2	7.5	2.26	0.5	198	3.31858	87.6106	4.52	657.08	1.65929	328.54	38.1	13.3	1	0
2	34	4	2	28	35	2790	7	9	9.4	6	2.13	0.3	299	2.8169	140.376	7.1	842.254	0.84507	252.676	27.9	9.3	2	1
2	33	2	1	20	39	3070	7	9	5.5	3	1.2	0.3	171	2.5	142.5	4	427.5	0.75	128.25	33	11	1	0
2	36	4	1	23	37	2000	7	9	14.5	9.4	2.72	1.2	261	3.45588	95.9559	2.26667	901.985	4.14706	1082.38	30.9	10.3	1	0
